# Supplementary material for: Comparison of the Androgenic Response of Spring and Winter Wheat (Triticum aestivum L.)
Source: PubMed Central journal article supplement (PMC7020181; doi:10.3390/plants9010049), 2019-12-31
Supplement: plants-09-00049-s001.pdf [file plants-09-00049-s001.pdf]

## Supplemental Materials

**Table S1.** Average monthly temperatures in the growing season from October 2015 to June 2016 in comparison to average temperatures of 57 years in Poznań Agricultural Research Station, Poland.

| Temperature |          |         |      |      |             |      |                                    |
|-------------|----------|---------|------|------|-------------|------|------------------------------------|
| Year        | Month    | Decades |      |      |             | Mean | Average Temperatures from 57 Years |
|             |          | I       | II   | III  |             |      |                                    |
| 2015        | October  | 9,8     | 6,7  | 8,1  | <b>8,2</b>  | 8,9  |                                    |
|             | November | 6,4     | 9    | 2,4  | <b>5,9</b>  | 3,8  |                                    |
|             | December | 6,1     | 5,1  | 5,7  | <b>5,6</b>  | 0,1  |                                    |
| 2016        | January  | -6,6    | -1,6 | 2,2  | <b>-2,0</b> | -1,2 |                                    |
|             | February | 5,5     | 2,2  | 2,8  | <b>3,5</b>  | -0,2 |                                    |
|             | March    | 2,5     | 2,5  | 6,0  | <b>3,7</b>  | 3,5  |                                    |
|             | April    | 10,2    | 9,3  | 6,4  | <b>8,6</b>  | 8,8  |                                    |
|             | May      | 13,7    | 12,9 | 19,2 | <b>15,3</b> | 14,3 |                                    |
|             | June     | 18,1    | 16,4 | 20,4 | <b>18,3</b> | 17,5 |                                    |

**Table S2.** Average monthly rainfall in the growing season from October 2015 to June 2016 in comparison to average rainfall of 57 years in Poznań Agricultural Research Station, Poland.

| Rainfall |          |         |      |      |             |       |                                |
|----------|----------|---------|------|------|-------------|-------|--------------------------------|
| Year     | Month    | Decades |      |      |             | Total | Average Rainfall from 57 Years |
|          |          | I       | II   | III  |             |       |                                |
| 2015     | October  | 0       | 19   | 0    | <b>19</b>   | 37,2  |                                |
|          | November | 8,7     | 32,5 | 12,3 | <b>53,5</b> | 35,8  |                                |
|          | December | 6,7     | 15,7 | 4,7  | <b>27,1</b> | 38,7  |                                |
| 2016     | January  | 6,4     | 16,2 | 9,0  | <b>31,6</b> | 31,5  |                                |
|          | February | 6,8     | 7,6  | 22,4 | <b>36,8</b> | 27,7  |                                |
|          | March    | 18,6    | 8,0  | 22,4 | <b>49,0</b> | 31,7  |                                |
|          | April    | 10,0    | 24,0 | 3,4  | <b>37,4</b> | 31,0  |                                |
|          | May      | 16,6    | 19,4 | 7,0  | <b>43,0</b> | 50,5  |                                |
|          | June     | 9,6     | 59,4 | 14,6 | <b>83,6</b> | 59,4  |                                |

**Table S3.** A comparison of the efficiency of androgenic structures formation (ASF), green plants regeneration (GPR) and albino plants regeneration (APR) of the influence of growth hormones in the induction media (I and II) on regeneration in the anther cultures of the spring and winter wheat based on right-sided (for Spring genotypes) and left-sided (for Winter genotypes) Wilcoxon test.

| Spring Genotypes - the Right-Sided Wilcoxon Test          |                                    |         |  |
|-----------------------------------------------------------|------------------------------------|---------|--|
| Parameters                                                | The Value of Wilcoxon's Statistics | p-Value |  |
| ASF (no of androgenic structures/100 plated anthers)      | 140.5                              | 0.127   |  |
| GPR (no of green plants regeneration/100 plated anthers)  | 103.5                              | 0.656   |  |
| APR (no of albino plants regeneration/100 plated anthers) | 136.5                              | 0.143   |  |
| Winter Genotypes - the Left-Sided Wilcoxon Test           |                                    |         |  |
| Parameters                                                | The value of Wilcoxon's statistics | p-value |  |
| ASF (no of androgenic structures/100 plated anthers)      | 96.5                               | 0.259   |  |
| GPR (no of green plants regeneration/100 plated anthers)  | 94.0                               | 0.207   |  |
| APR (no of albino plants regeneration/100 plated anthers) | 128.0                              | 0.777   |  |

**Table S4.** Wilcoxon right-side test comparing efficiency.

| Parameters       | Spring Genotypes                   |                 |
|------------------|------------------------------------|-----------------|
|                  | The Value of Wilcoxon's Statistics | <i>p</i> -Value |
| ASF              | 18376                              | 0.01024*        |
| GPR              | 16985                              | 0.1487          |
| APR              | 18512                              | < 0.0001***     |
| Winter Genotypes |                                    |                 |
| ASF              | 14808                              | 0.9344          |
| GPR              | 15166                              | 0.9496          |
| APR              | 16387                              | 0.3245          |

Signif. codes: 0 '\*\*\*' 0.001 '\*\*' 0.01 '\*' 0.05.

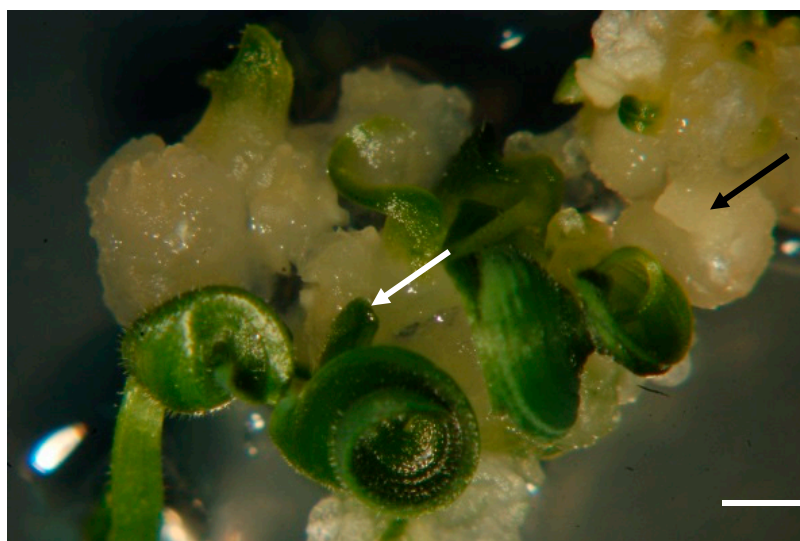

**Figure S1.** Androgenic structures (black arrow) with a green plant developing (white arrow) 14 days after passage to regeneration medium (Ac Abbey spring phenotype). Bar represents 1 mm.

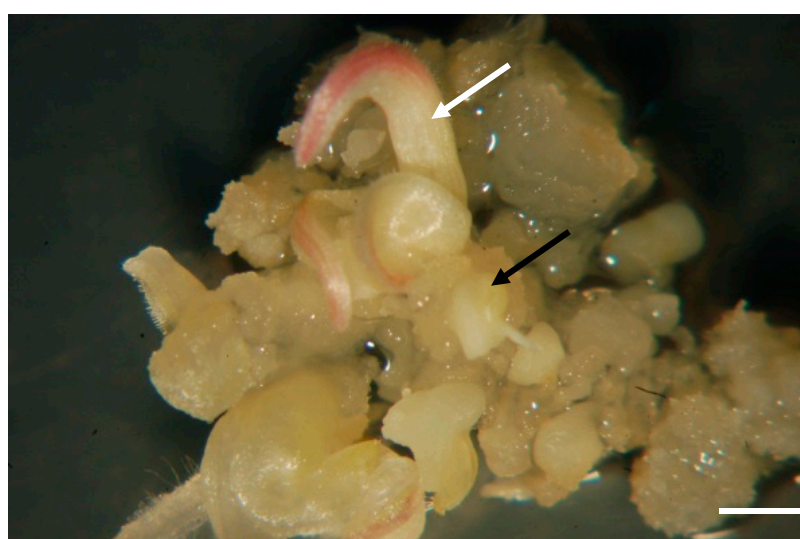

**Figure S2.** Androgenic structures (black arrow) with an albino plant developing (white arrow) 14 days after passage to regeneration medium (Ac Abbey spring phenotype). Bar represents 1 mm.
